# Supplementary material for: A molten salt strategy for deriving a porous Si@C nano-composite from Si-rich biomass for high-performance Li-ion batteries
Source: Royal Society of Chemistry journal article supplement (doi:10.1039/c6ra16336j), 2016-01-01
Supplement: c6ra16336j1.pdf [file c6ra16336j1.pdf]

## Supporting Information

### **A molten salt strategy for deriving porous Si@C nano-composite from Si-rich biomass for high-performance Li-ion batteries**

Ning Lin, Tianjun Xu, Ying Han, Kangze Shen, Yongchun Zhu, and Yitai Qian\*

#### **Experimental section**

**Materials synthesis:** Typically, dried natural bamboo leaves were ball-milled into fine powder, which was immersed into 2.0 M HCl solution for 2 h. After dried at 60 °C, the precursors were loaded in a covered alundum crucible and calcinated at 400 °C for 100 min under air atmosphere. Next, a mixture of 1.0 g of the obtained SiO<sub>2</sub>/C intermediate, 0.6 g metallic Mg powder and excess AlCl<sub>3</sub> was sealed in a stainless steel autoclave (20 ml), and heated at 200 °C for 6 h. The ramping speed for the heating process was kept at 5 °C min<sup>-1</sup>. The obtained sample was soaked in 1 M HCl solution for 2 h, then washed with ethanol and water for several times. The obtained sample was then immersed in diluted ethanol-based hydrofluoric acid (HF) solution for 10 min to remove the residual silicon oxides. After washing, the sample is vacuum-dried at 50 °C.

**Characterization:** The structure and morphology of the product were characterized by X-ray diffractometer (Philips X' Pert Super diffract meter with Cu K $\alpha$  radiation ( $\lambda=1.54178$  Å)), Raman spectrometer (Lab-RAM HR UV/VIS/NIR), FTIR instrument

(FTIR, Hyperion 3000), scanning electron microscopy (SEM, JEOL-JSM-6700F), and transmission electron microscopy (TEM, Hitachi H7650 and HRTEM, JEOL 2010). Thermal gravimetric analysis (TGA) measurement was carried out on TGA Q5000 V3.15 Build 263 from room temperature to 800 °C in air.

***Electrochemical Measurement:*** The electrochemical properties of the prepared Si@C sample were evaluated through coin-type cells (2016 R-type) which were assembled under an argon-filled glove box ( $\text{H}_2\text{O}$ ,  $\text{O}_2 < 1$  ppm). Metallic Li sheet was used as counter and reference electrode. 1 M  $\text{LiPF}_6$  in a mixture of ethylene carbonate/dimethyl carbonate (EC/DMC; 1:1 by volume) was served as the electrolyte (Zhuhai Smooth way Electronic Materials Co., Ltd (china)). For preparing working electrode, the slurry mixed with as-prepared active Si@C material, carbon black (super P) and sodium alginate (SA) binder in a weight ratio of 8:1:1 in water solvent was pasted onto a Cu foil, and then dried in a vacuum oven at 80 °C for 10 h. The active material density of each electrode was determined to be about 1.0 mg  $\text{cm}^{-2}$ . Galvanostatic measurements were conducted using a LAND-CT2001A instrument at room temperature with a fixed voltage range of 0.01-1.5 V (vs.  $\text{Li}/\text{Li}^+$ ). Cyclic voltammetry (CV) was performed on electrochemistry workstation (CHI660D), with a scanning rate of 0.1  $\text{mV s}^{-1}$  at room temperature.

For assembling the full cells, the commercial available  $\text{LiCoO}_2$  is employed as cathode. The  $\text{LiCoO}_2$  cathode electrode was prepared by mixing the commercial  $\text{LiCoO}_2$  material, carbon black, and poly(vinyl difluoride) (PVDF) binder in a weight ratio of 8:1:1. N-Methyl-2-pyrrolidone (NMP) was used as the solvent to form slurry.

The resulting slurry was coated onto the Al foil and dried at 120 °C for 12h for further use. A pre-lithiation treatment of Si@C anodes was performed in half-cells which is discharged at cut-off voltage of 0.1 V vs. Li/Li<sup>+</sup> at 0.3 A g<sup>-1</sup>. For Si@C /LiCoO<sub>2</sub> full cell assembly, the anode capacity is limited and the excess capacity of cathode is controlled at about 10%. The reversible capacity and energy density of the full cells were calculated based on the weight of Si@C. Galvanostatic measurements of the full cells were conducted using a LAND-CT2001A instrument at room temperature with a voltage range of 2.5-4.2 V.

(1)

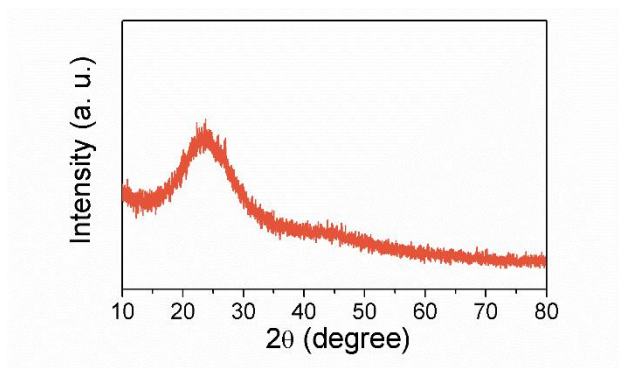

**Figure S1.** The XRD pattern of the baked bamboo leaves.

(2)

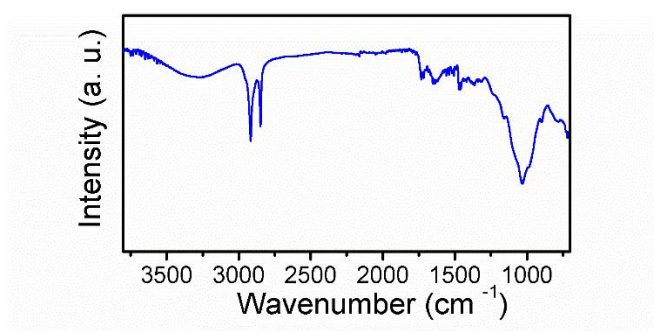

**Figure S2.** The FT-IR plots of the dried bamboo leaves.

(3)

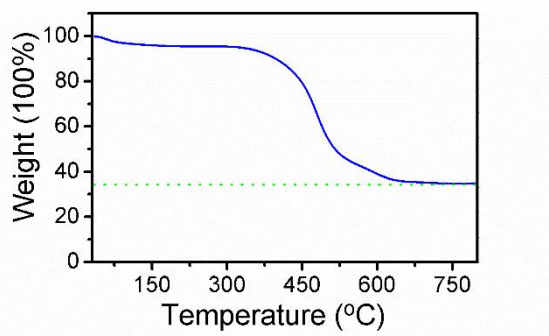

**Figure S3.** Thermal gravimetric analysis (TGA) plot of the Si@C composite from room temperature to 800 °C in air.

(4)

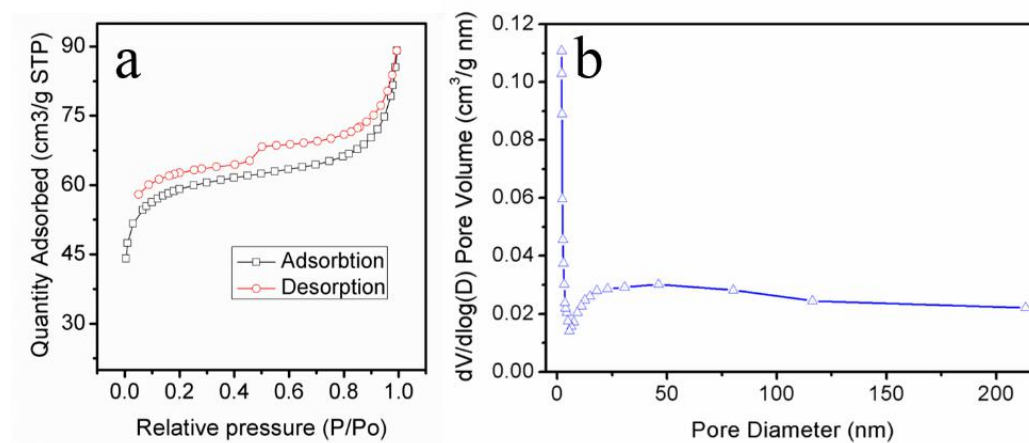

**Figure S4.** The BET Isotherm Linear Plot, and (b) the BJH pore distribution of the Si@C composite.

The Figure S5 exhibits the discharge/charge voltage curves of the Si@C electrode. In the first cycle, the discharge potential plateau is below 0.2 V which is mainly resulted from the Li-alloying reaction with Si. In the subsequent cycle, the discharge plateau shift to higher potential, because Si nanoparticles in the composite changed from crystallized to amorphous structure during the lithiation/delithiation process. On the other hand, the charge voltage plateaus are located at around 0.4 V that is corresponding to the de-alloying reaction of  $\text{Li}_x\text{Si}$ . This section has been provided in the revised supporting information, please check, thank you.

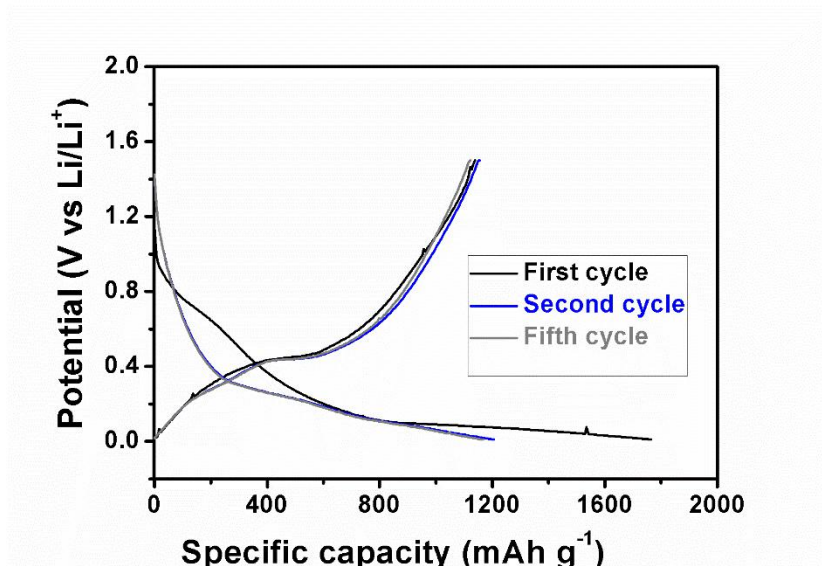

**Figure S5.** Charge/discharge voltage curves of Si@C composite.
